# Supplementary material for: circGSK3β promotes metastasis in esophageal squamous cell carcinoma by augmenting β-catenin signaling
Source: PubMed Central journal article supplement (PMC6854808; doi:10.1186/s12943-019-1095-y), 2019-11-14
Supplement: 12943_2019_1095_MOESM1_ESM.pdf [file 12943_2019_1095_MOESM1_ESM.pdf]

**A**

|                  | T>N         | T=N      | T<N         |
|------------------|-------------|----------|-------------|
| circGSK3 $\beta$ | 70% (35/50) | 0 (0/50) | 30% (15/50) |

**B**

|                  | MFS |       |             |          | OS |       |             |          |
|------------------|-----|-------|-------------|----------|----|-------|-------------|----------|
|                  | n   | HR    | 95%CI       | <i>P</i> | n  | HR    | 95%CI       | <i>P</i> |
| circGSK3 $\beta$ |     |       |             |          |    |       |             |          |
| Low              | 9   | 1     |             |          | 14 | 1     |             |          |
| High             | 11  | 2.931 | 1.468-6.379 | <0.01    | 23 | 6.035 | 1.038-10.39 | <0.05    |

**Figure S1. Expression of circGSK3 $\beta$  in human ESCC.** (A) Statistical comparison of differences in expression of circGSK3 $\beta$  in human ESCC and adjacent non-tumor tissues. (B) Statistical analyses of the association of circGSK3 $\beta$  expression with overall survival time and metastasis free survival time of ESCC patients. *n*: sample number; OS: overall survival; MFS: Metastasis-free survival; CI: confidence interval; HR: hazard ratio; *P*: P-value.

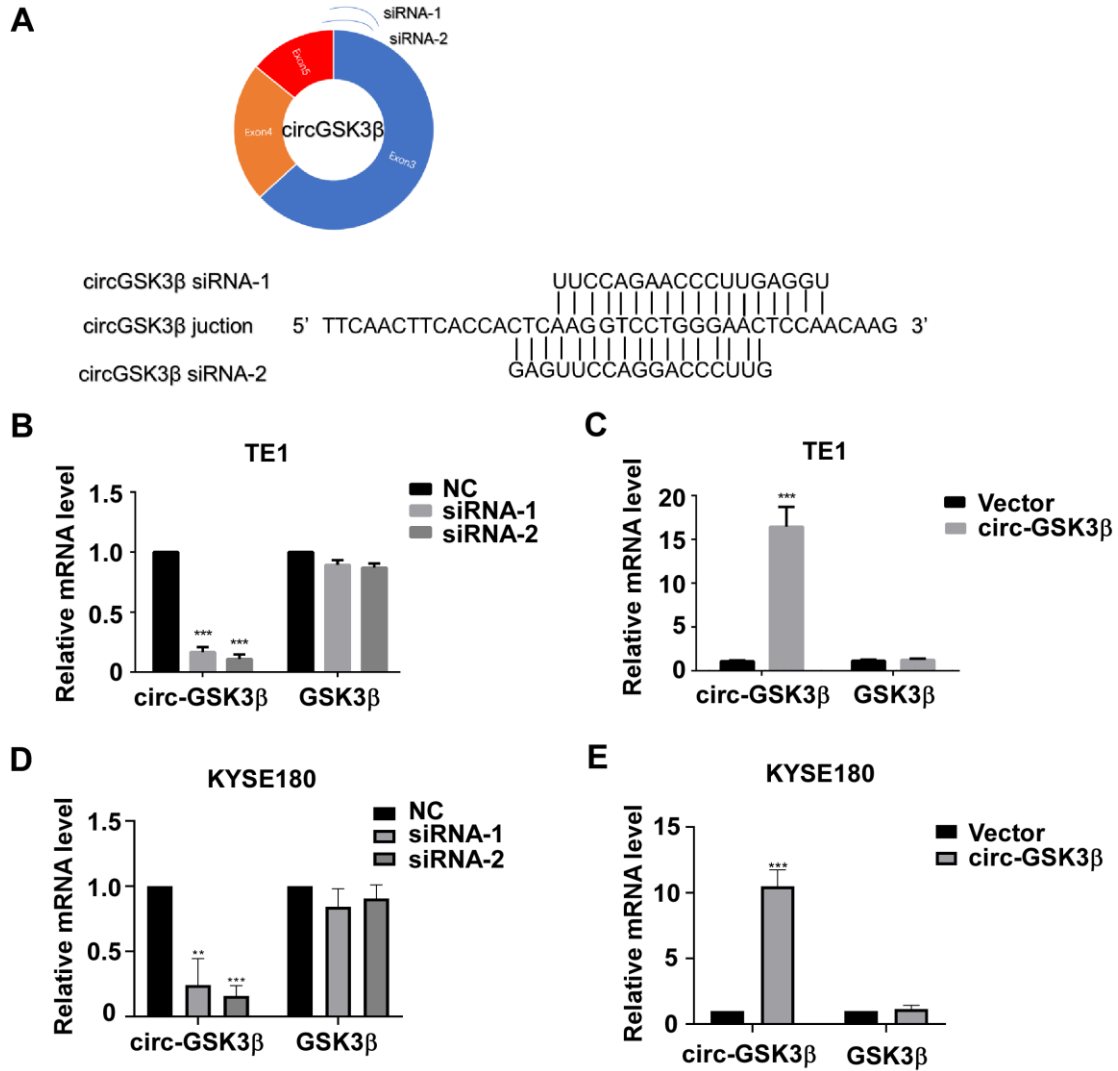

**Figure S2. Depletion and overexpression of circGSK3β in ESCC cells.** (A) Schematic illustration showed two siRNAs targeting circGSK3β. si-circGSK3β targets the back-splice junction of circGSK3β. (B&C) qRT-PCR for circGSK3β and GSK3β mRNA levels in TE1 cells with depletion (B) or overexpression (C) of circGSK3β. (D&E) qRT-PCR for circGSK3β and GSK3β mRNA levels in KYSE180 cells with depletion (D) or overexpression (E) of circGSK3β. Data are represented as the mean ± S.D. of triplicates. \*\* $P < 0.01$ ; \*\*\* $P < 0.001$ .

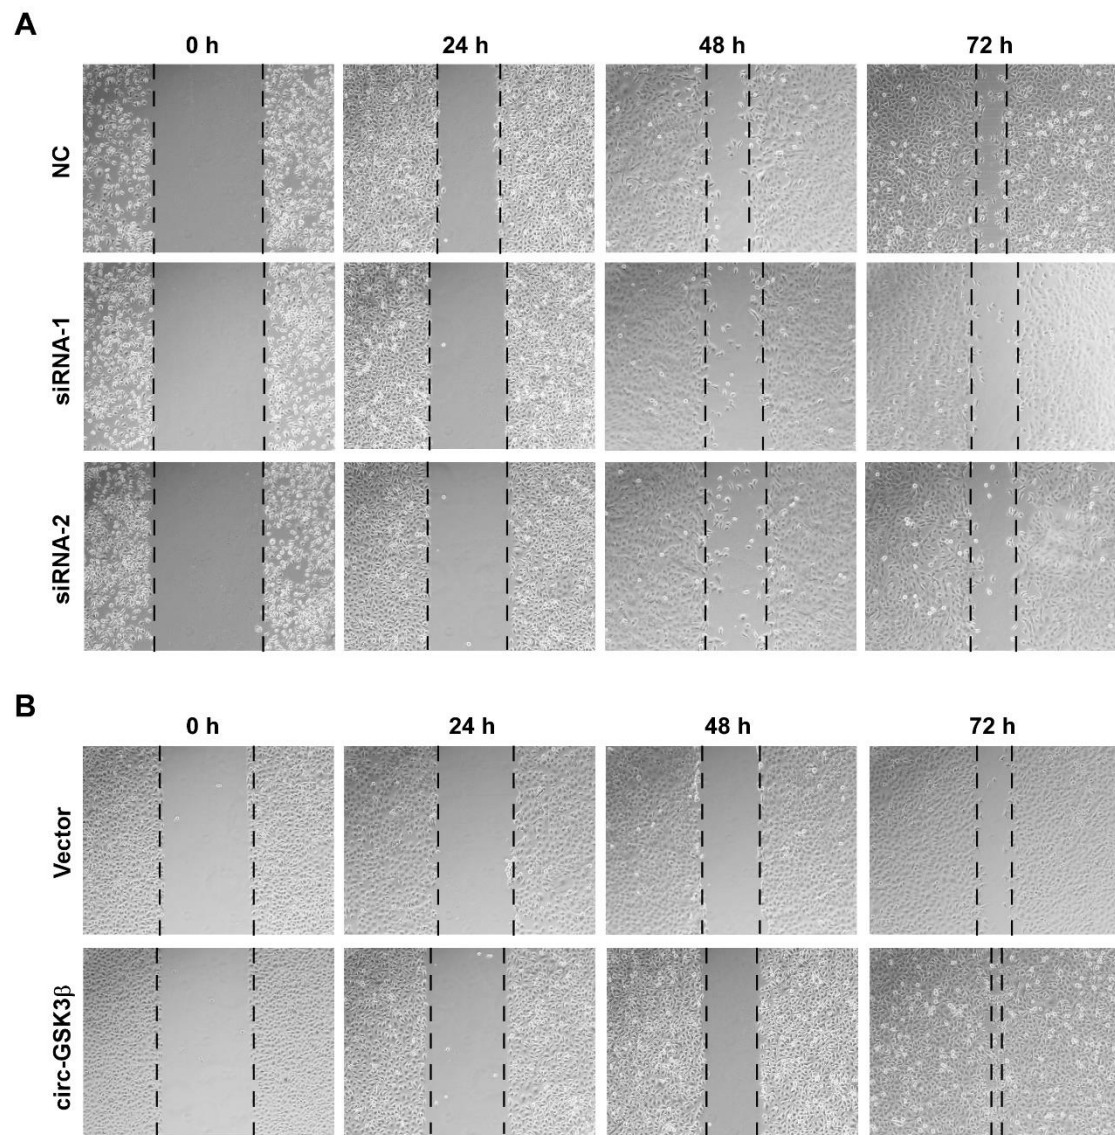

**Figure S3. circGSK3 $\beta$  promoted TE1 cell motility.** The cell motility was analyzed by the scratch wound healing assays as described in Methods. Representative images were shown.

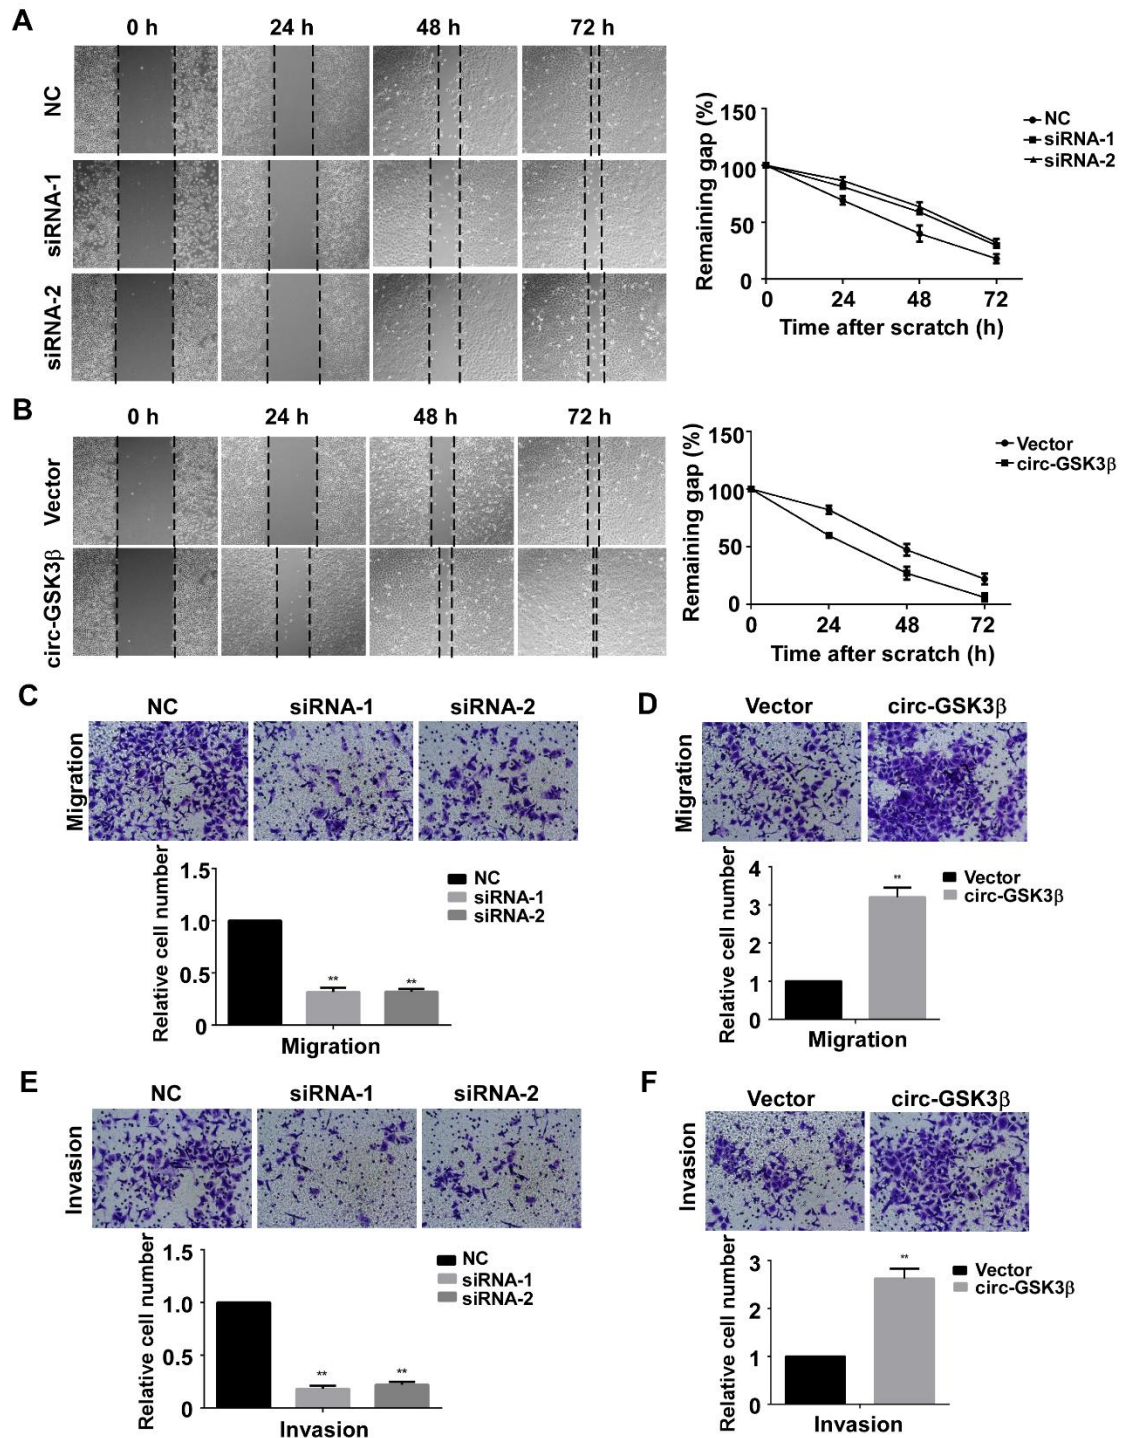

**Figure S4. CircGSK3 $\beta$  promotes KYSE180 cell migration and invasion. (A&B)** Scratch wound assays for circGSK3 $\beta$  depleted (A) or overexpressed (B) KYSE180 cells. The average sizes of the gaps were measured at the indicated times and expressed as mean  $\pm$  SD of triplicated samples. **(C&D)** Transwell chamber assays for circGSK3 $\beta$ -depletion (C) or overexpressed (D) KYSE180 cells. The average numbers of migrated cells were counted after 24 h incubation and expressed as mean  $\pm$  S.D. **(E&F)** Matrigel invasion assays for circGSK3 $\beta$ -depletion (E) or overexpressed (F) KYSE180 cells. The average numbers of migrated cells were counted after 24 h incubation and expressed as mean  $\pm$  S.D. \*\* $P < 0.01$ .

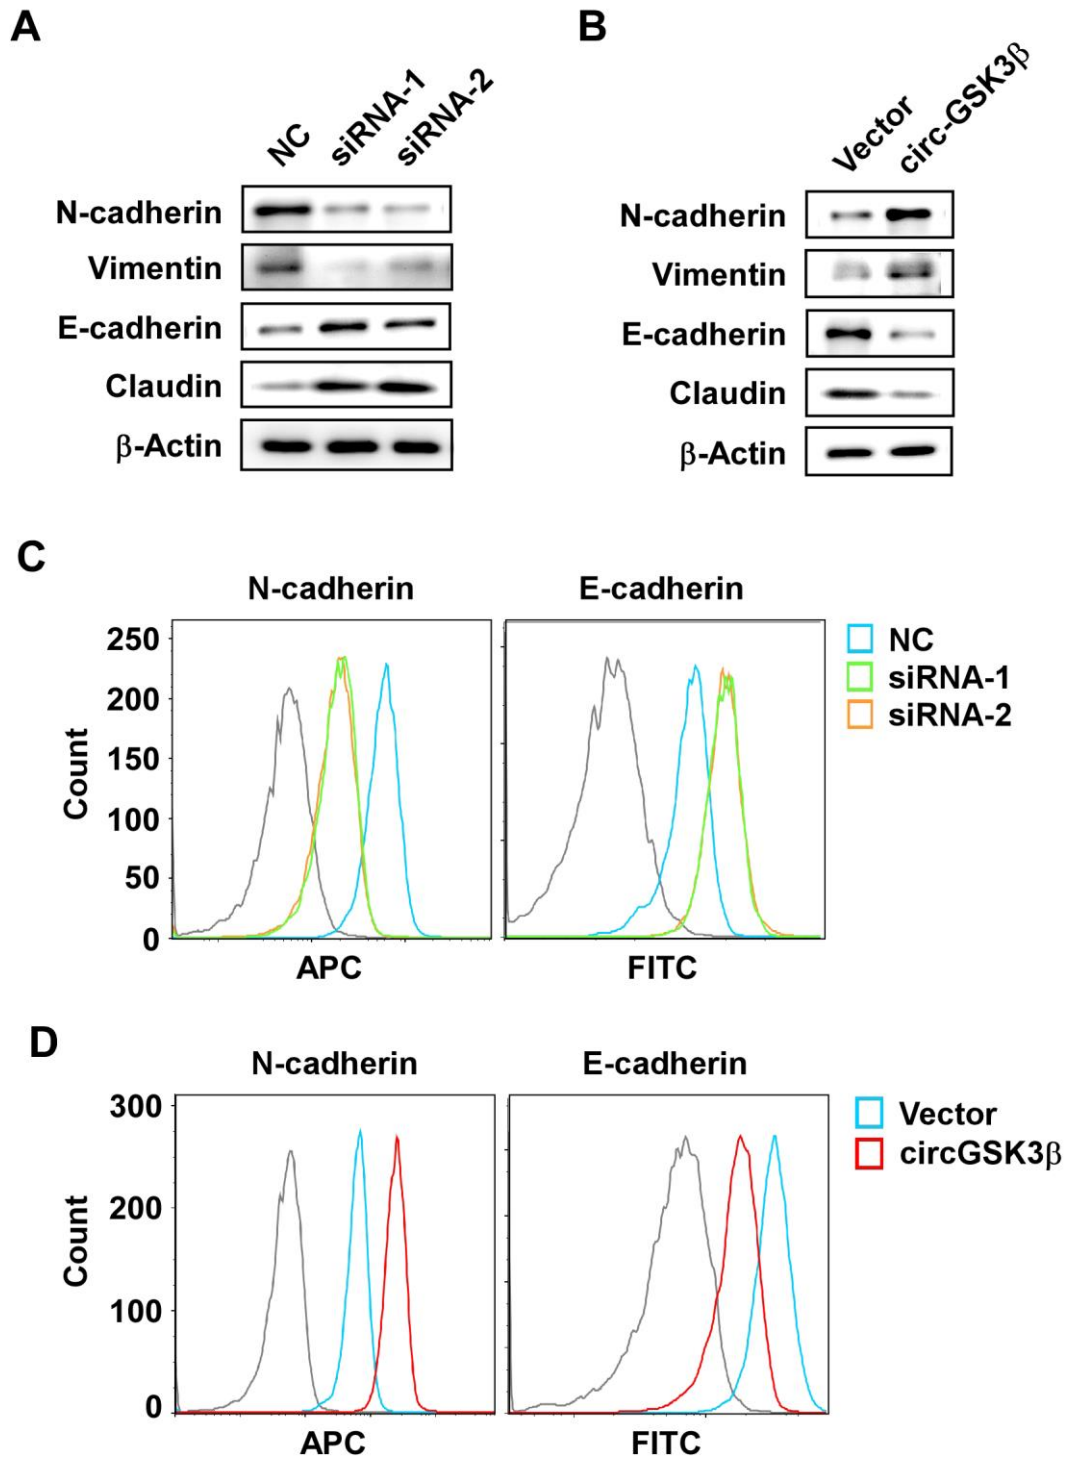

**Figure S5. CircGSK3 $\beta$  promotes KYSE180 cell EMT. (A&B)** EMT marker protein levels in KYSE180 cells with circGSK3 $\beta$  depletion (A) or overexpression (B) were detected by immunoblotting. **(C&D)** E-cadherin and N-cadherin protein levels in KYSE180 cells with circGSK3 $\beta$  depletion (C) or overexpression (D) were detected by Flow cytometry.

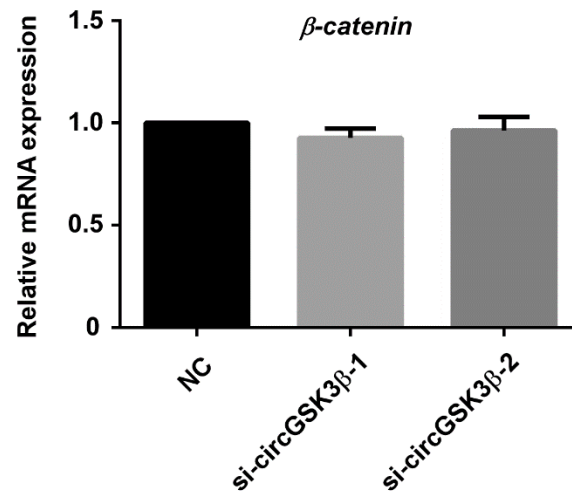

**Figure S6. circGSK3 $\beta$  does not affect mRNA levels of  $\beta$ -catenin.** TE1 cells with depletion of circGSK3 $\beta$  and the control cells were harvested and the  $\beta$ -catenin mRNA levels were determined by real-time RT-PCR assay. NC: negative control.

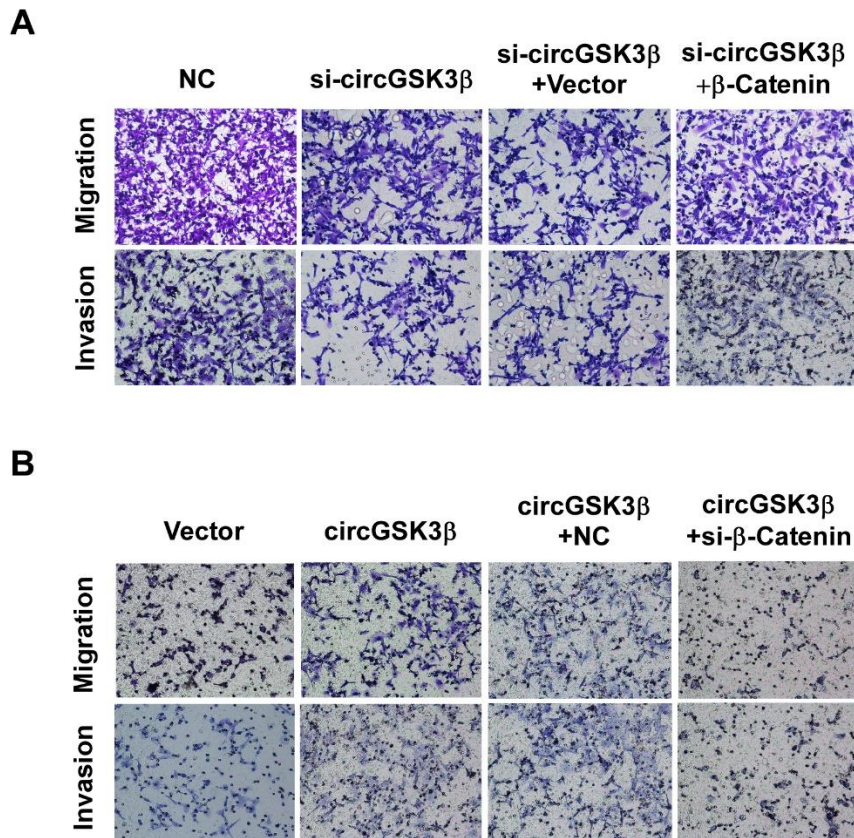

**Figure S7. CircGSK3 $\beta$  promotes ESCC migration and invasion through  $\beta$ -catenin.** ESCC cells with depletion of circGSK3 $\beta$  were transfected with  $\beta$ -catenin (A) and circGSK3 $\beta$ -overexpressed cells were transfected with control siRNA or siRNA against  $\beta$ -catenin (B). Migration and invasion abilities of ESCC cells were detected by Transwell and Matrigel invasion assay, respectively.

**A**

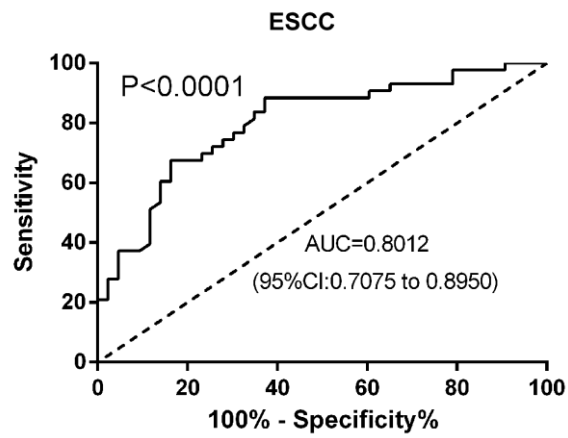

**B**

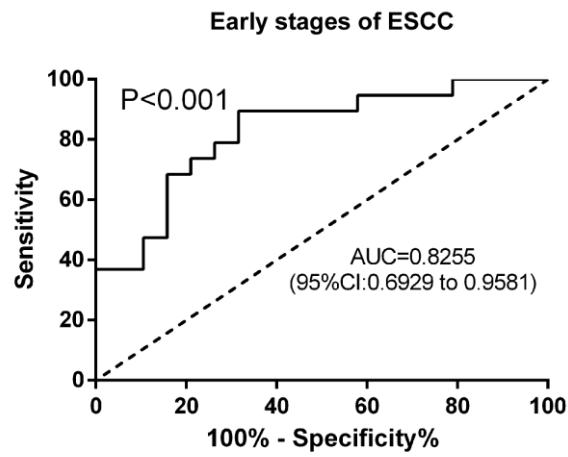

**Figure S8. The diagnosis value between ESCC or early stages of ESCC and normal controls in the validation cohort. ROC curves showing plasma levels of circGSK3 $\beta$  in ESCC patients (A) and early stages of ESCC patients (B).**



| Variables   | ESCC             |        |             | Early stage of ESCC |        |             |
|-------------|------------------|--------|-------------|---------------------|--------|-------------|
|             | circGSK3 $\beta$ | CEA    | Combination | circGSK3 $\beta$    | CEA    | Combination |
| ROC         | 0.782            | 0.615  | 0.800       | 0.793               | 0.623  | 0.793       |
| Sensitivity | 86.05%           | 39.53% | 79.10%      | 68.75%              | 81.25% | 87.50%      |
| Specificity | 58.14%           | 83.72% | 67.40%      | 81.25%              | 50%    | 62.50%      |

**Figure S9. The diagnosis value between ESCC or early stages of ESCC and normal controls.** ROC curves were applied to analysis the diagnostic values of circRNA and CEA. Youden index (sensitivity + specificity-1) was chosen to identify the optimal cut-off threshold values.
